# Supplementary material for: Solution-processed tungsten oxide with Ta5+ doping enhances the hole selective transport for crystalline silicon solar cells
Source: Royal Society of Chemistry journal article supplement (doi:10.1039/d4tc03049d), 2024-01-01
Supplement: d4tc03049d1.pdf [file d4tc03049d1.pdf]

## Supporting Information

### **Solution-processed tungsten oxide with Ta<sup>5+</sup> doping enhances the hole selective transport for crystalline silicon solar cells**

Dan Liu<sup>a</sup>, Penghui Ren<sup>a</sup>, Di Zhao<sup>a</sup>, Songyu Li<sup>a</sup>, Jianqiao Wang<sup>a</sup>, Hang Zhou<sup>a</sup>, Wei Liu<sup>b</sup>, Yuheng Zeng<sup>b</sup>, Xuegong Yu<sup>c</sup>, Peng Wang<sup>a\*</sup>, Can Cui<sup>a\*</sup>

<sup>a</sup>Zhejiang Key Laboratory of Quantum State Control and Optical Field Manipulation,  
Department of Physics, Zhejiang Sci-Tech University, Hangzhou, 310018, China

<sup>b</sup>Ningbo Institute of Materials Technology and Engineering, Chinese Academy of Sciences, Ningbo 315201, China

<sup>c</sup>State Key Laboratory of Silicon and Advanced Semiconductor Materials, School of Materials Science and Engineering, Zhejiang University, Hangzhou 310027, China

E-mail: pengwang@zstu.edu.cn, cancui@zstu.edu.cn

## **The DFT calculation**

All models used for calculation in this work were built using Materials Studio 2020 and visualized using VESTA. First-principles calculations based on density functional theory (DFT) were carried out using the Vienna Ab initio Simulation Package (VASP). The Perdew-Burke-Ernzerhof (PBE) functional was employed to describe the exchange-correlation interaction. The plane-wave cut-off energy of 400 eV, and  $\Gamma$ -centered k-mesh with k-spacing of  $0.02 \text{ \AA}^{-3}$  in the Brillouin zone were used for geometry optimization and self-consistent calculation. The convergence criteria for total energy were set to  $10^{-8} \text{ eV/atom}$ . The van der Waals interaction was considered using DFT-D3 method. Based on the model, we calculated the free energy, ELF and DOS of the system as  $\text{W}^{5+}$  or  $\text{W}^{6+}$  is replaced by  $\text{Ta}^{5+}$ , respectively. The more negative the free energy of the system, the higher probability the substitution takes place.

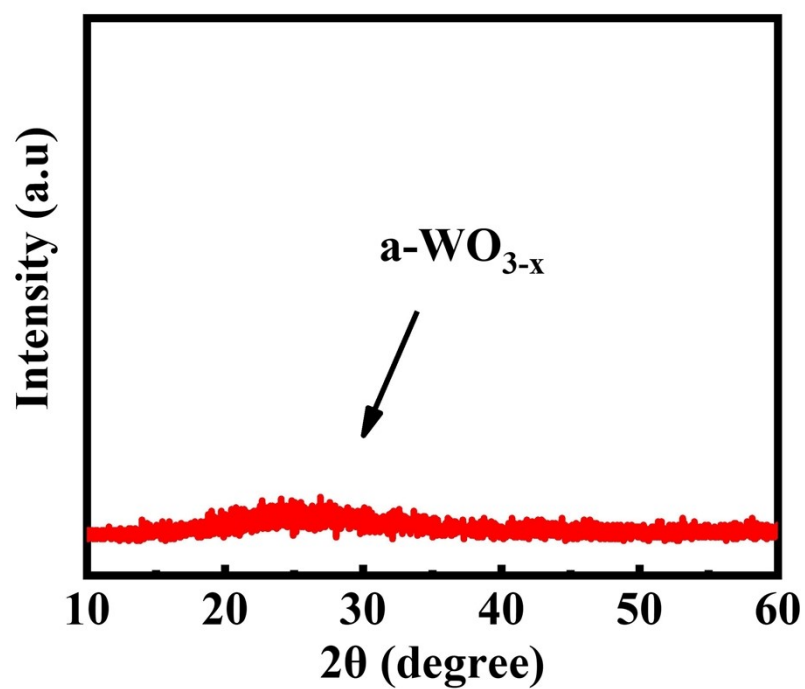

**Figure S1.** The XRD pattern of undoped WO<sub>3-x</sub> film annealed at 100 °C.

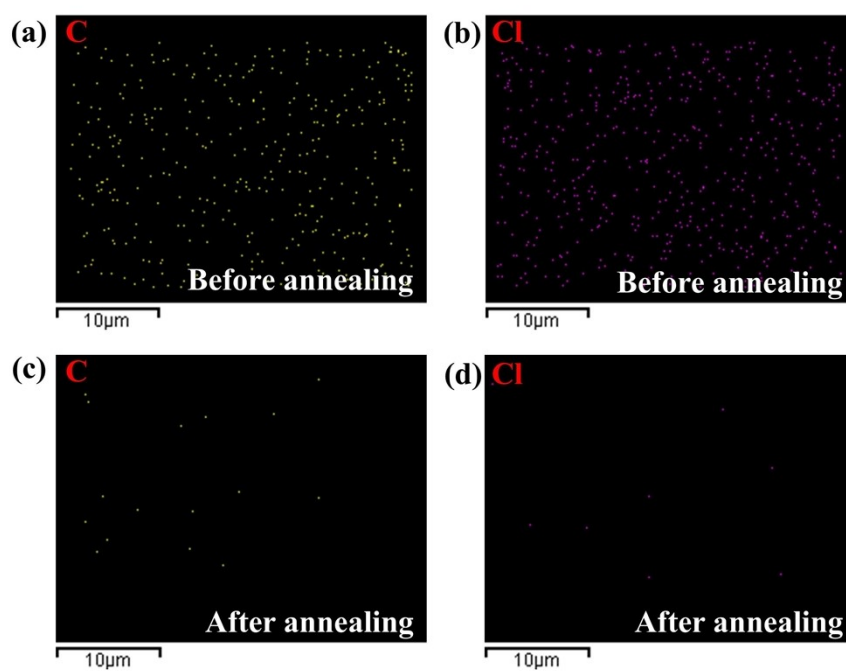

**Figure S2.** The EDS mapping images of the undoped WO<sub>3-x</sub> films (a, b) before and after (c, d) annealing at 100°C.

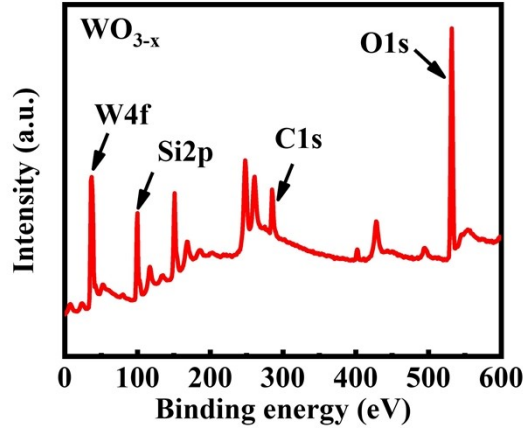

**Figure S3.** The XPS spectrum of the undoped  $\text{WO}_{3-x}$  film after annealing at  $100^\circ\text{C}$ .

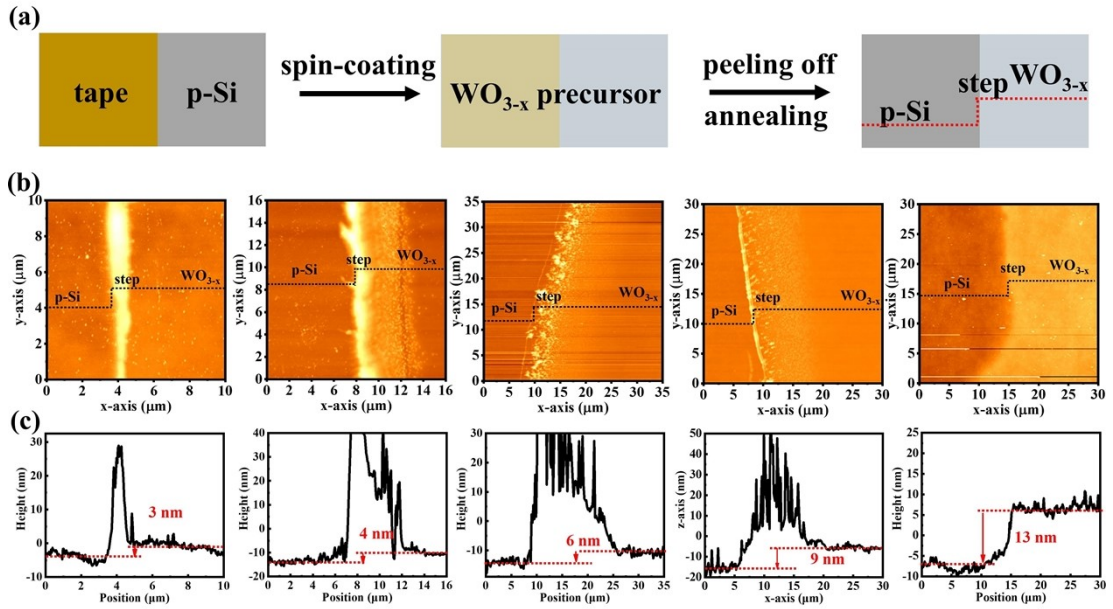

**Figure S4.** AFM measurements employed to estimate the thickness of undoped  $\text{WO}_{3-x}$  films. (a) The schematic diagram of AFM measurements. (b) The AFM images of  $\text{WO}_{3-x}$  films with different thicknesses. (c) Height plots showing the thicknesses of  $\text{WO}_{3-x}$  films.

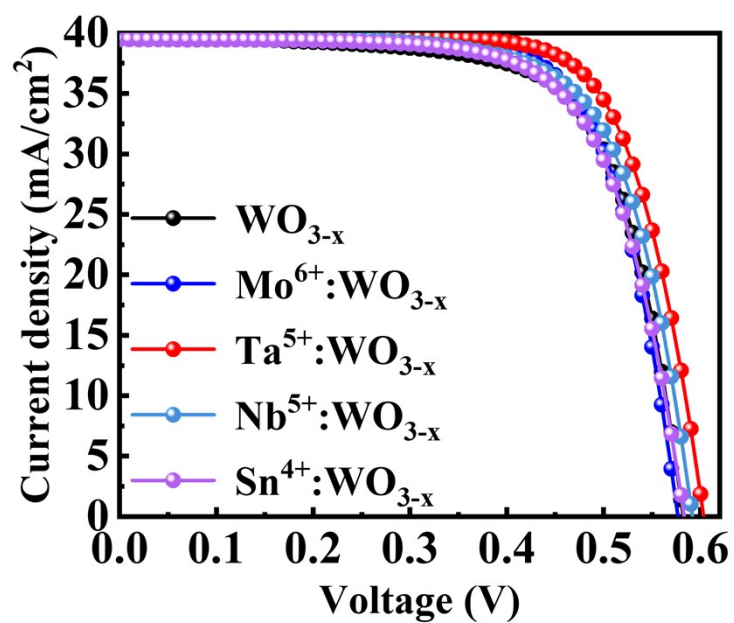

**Figure S5.** Illuminated  $J$ - $V$  curves of heterojunction devices with  $\text{WO}_{3-x}$  films doped with ions of different valence states ( $\text{Mo}^{6+}$ ,  $\text{Ta}^{5+}$ ,  $\text{Nb}^{5+}$ ,  $\text{Sn}^{4+}$ ).

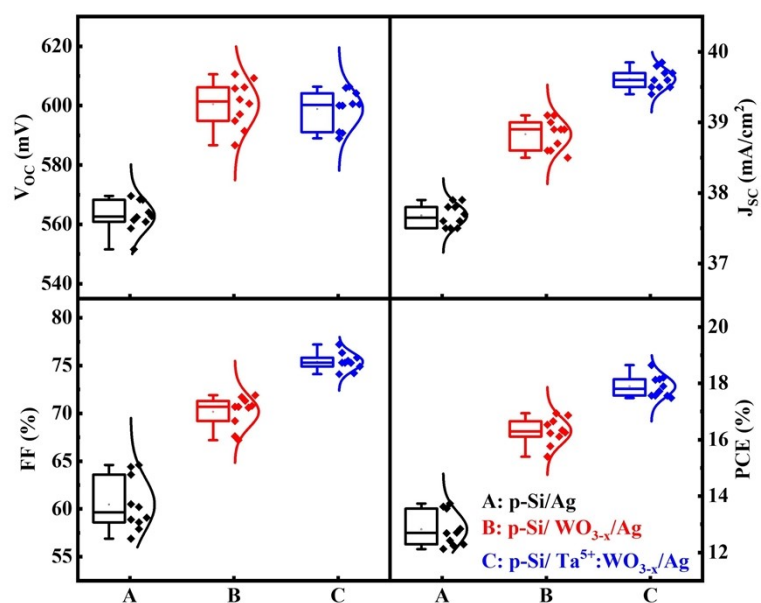

**Figure S6.** Device performance statistics with the structure of p-Si/Ag, p-Si/ $\text{WO}_{3-x}$ /Ag and p-Si/ $\text{Ta}^{5+}(1\%):\text{WO}_{3-x}$ /Ag.

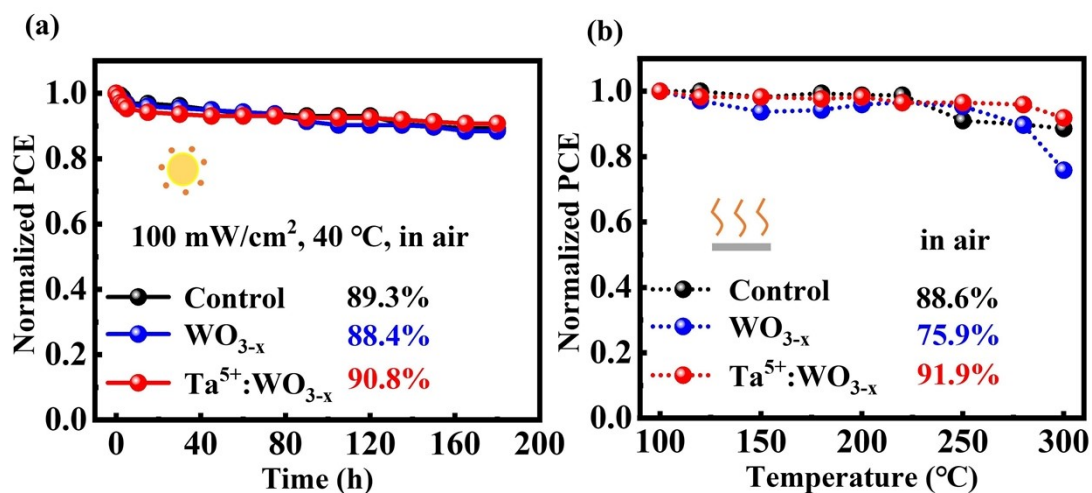

**Figure S7.** (a) The operational stability of the solar cells with the structure of p-Si/Au/Ag, p-Si/ $\text{WO}_{3-x}$ /Au/Ag and p-Si/ $\text{Ta}^{5+}$ (1%): $\text{WO}_{3-x}$ /Au/Ag measured under continuous light illumination (100 mW/cm²) at the temperature of 40 °C in air. (b) Thermal stability of the devices at different temperatures in air.

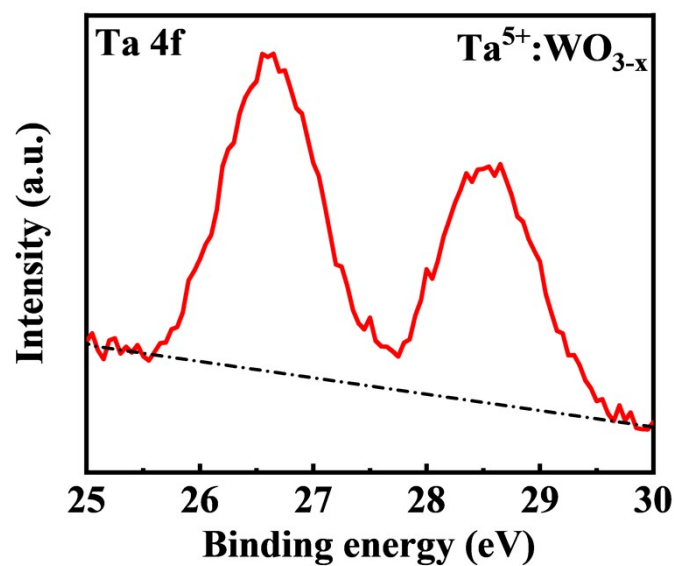

**Figure S8.** XPS spectra of Ta 4f orbitals of  $\text{Ta}^{5+}$ (1%): $\text{WO}_{3-x}$  films.

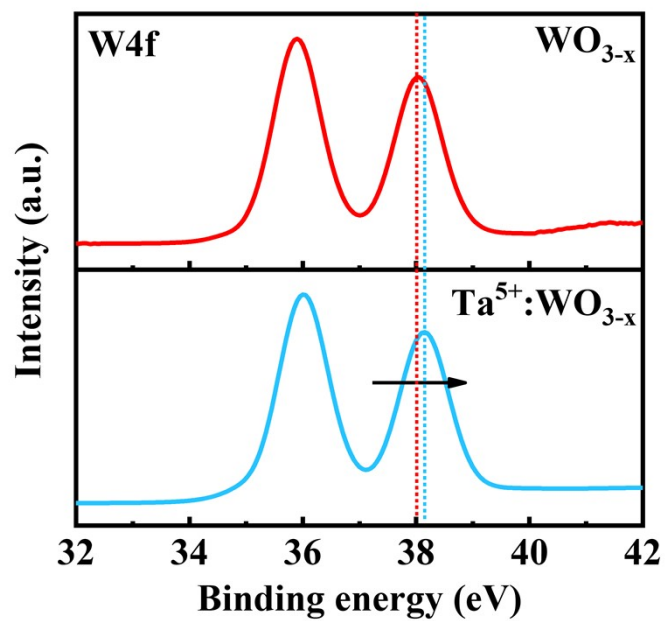

**Figure S9.** XPS spectra of W 4f orbitals of undoped and 1% Ta<sup>5+</sup> doped WO<sub>3-x</sub> films.

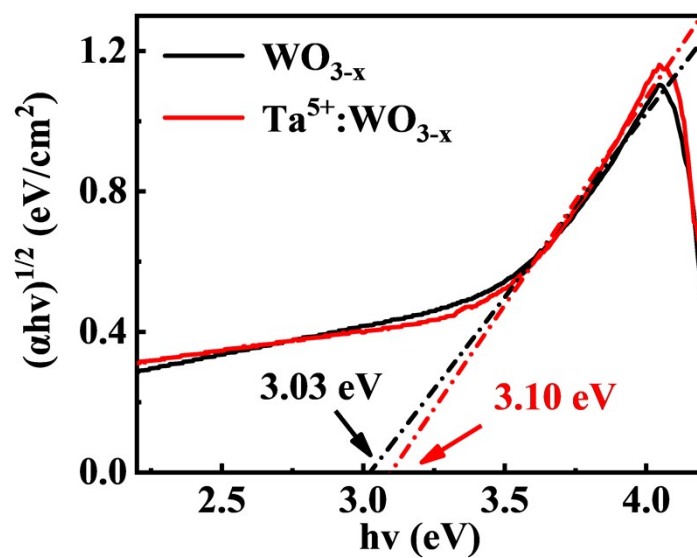

**Figure S10.** Fitted bandgaps of undoped and 1% Ta<sup>5+</sup> doped WO<sub>3-x</sub> films.

**Table S1** Output parameters of WO<sub>3-x</sub>/p-Si heterojunction solar cells with different film thicknesses.

| <b>Thickness<br/>(nm)</b> | <b><math>V_{OC}</math><br/>(mV)</b> | <b><math>J_{SC}</math><br/>(mA/cm<sup>2</sup>)</b> | <b>FF<br/>(%)</b> | <b>PCE<br/>(%)</b> |
|---------------------------|-------------------------------------|----------------------------------------------------|-------------------|--------------------|
| 0                         | 560.9                               | 37.6                                               | 58.6              | 12.4               |
| 3                         | 569.9                               | 38.5                                               | 63.4              | 13.9               |
| 4                         | 570.9                               | 38.6                                               | 63.6              | 14.0               |
| 6                         | 573.6                               | 38.7                                               | 68.7              | 15.3               |
| 9                         | 583.5                               | 39.0                                               | 70.2              | 16.0               |
| 13                        | 586.4                               | 38.6                                               | 68.4              | 15.5               |

**Table S2** Output parameters of WO<sub>3-x</sub>/p-Si heterojunction solar cells with different ion doping.

| <b>Film</b>                         | <b><math>V_{OC}</math> (mV)</b> | <b><math>J_{SC}</math> (mA/cm<sup>2</sup>)</b> | <b>FF (%)</b> | <b>PCE (%)</b> |
|-------------------------------------|---------------------------------|------------------------------------------------|---------------|----------------|
| WO <sub>3-x</sub>                   | 582.3                           | 39.2                                           | 69.6          | 15.9           |
| Mo <sup>6+</sup> :WO <sub>3-x</sub> | 576.8                           | 39.8                                           | 71.6          | 16.5           |
| Ta <sup>5+</sup> :WO <sub>3-x</sub> | 603.1                           | 39.8                                           | 73.0          | 17.5           |
| Nb <sup>5+</sup> :WO <sub>3-x</sub> | 591.7                           | 39.8                                           | 70.2          | 16.5           |
| Sn <sup>4+</sup> :WO <sub>3-x</sub> | 583.2                           | 39.3                                           | 69.4          | 15.9           |

**Table S3.** Simulation parameters of WO<sub>3-x</sub>/p-Si heterojunction without and with Ta<sup>5+</sup> doping.

| Parameters                                               | p-Si                               | WO <sub>3-x</sub>                  | Ta <sup>5+</sup> :WO <sub>3-x</sub> |
|----------------------------------------------------------|------------------------------------|------------------------------------|-------------------------------------|
| Layer thickness (cm)                                     | 1.5×10 <sup>-2</sup>               | 1×10 <sup>-6</sup>                 | 1×10 <sup>-6</sup>                  |
| Doping concentration (cm <sup>-3</sup> )                 | N <sub>a</sub> =1×10 <sup>14</sup> | N <sub>d</sub> =1×10 <sup>17</sup> | N <sub>d</sub> =1×10 <sup>15</sup>  |
| Relative dielectric constant                             | 11.9                               | 10                                 | 10                                  |
| Electron affinity (eV)                                   | 4.05                               | 4.64                               | 4.69                                |
| Band gap (eV)                                            | 1.124                              | 3.03                               | 3.10                                |
| Optical band gap (eV)                                    | 1.124                              | 3.03                               | 3.10                                |
| Effective conduction band<br>density (cm <sup>-3</sup> ) | 2.846×10 <sup>19</sup>             | 5.0×10 <sup>20</sup>               | 5.0×10 <sup>20</sup>                |
| Effective valence band<br>density (cm <sup>-3</sup> )    | 2.685×10 <sup>19</sup>             | 5.0×10 <sup>20</sup>               | 5.0×10 <sup>20</sup>                |
| Electron mobility (cm <sup>2</sup> /Vs)                  | 1041                               | 10                                 | 10                                  |
| Hole mobility (cm <sup>2</sup> /Vs)                      | 412.9                              | 1                                  | 1                                   |

The *film thickness, band gap, optical band gap* and *electron affinity* are obtained from the experimental results. The other simulation parameters of Table S3 are cited from the references of H. Mehmood et al., *Renew. Energy*, 2022, **183**, 188-201; R. A. Vijayan et al., *IEEE J. Photovolt.*, 2018, **8**, 473-482.
